# Supplementary material for: Phenylalanine Promotes Biofilm Formation of Meyerozyma caribbica to Improve Biocontrol Efficacy against Jujube Black Spot Rot
Source: MDPI journal article supplement (doi:10.3390/jof8121313), 2022-12-17
Supplement: s1 [file s1]

Article

# Phenylalanine Promotes Biofilm Formation of *Meyerozyma caribbica* to Improve Biocontrol Efficacy against Jujube Black Spot Rot

Qian Deng <sup>1</sup>, Xingmeng Lei <sup>1</sup>, Hongyan Zhang <sup>1</sup>, Lili Deng <sup>1,2</sup>, Lanhua Yi <sup>1,2</sup> and Kaifang Zeng <sup>1,2,3,\*</sup>

<sup>1</sup> College of Food Science, Southwest University, Chongqing 400715, China

<sup>2</sup> Food Storage and Logistics Research Center, Southwest University, Chongqing 400715, China

<sup>3</sup> Chongqing Key Laboratory of Speciality Food Co-Built by Sichuan and Chongqing, Chongqing 400715, China

\* Correspondence: zengkaifang@hotmail.com

## Supplementary Materials

**Citation:** Deng, Q.; Lei, X.; Zhang, H.; Deng, L.; Yi, L.; Zeng, K. Phenylalanine Promotes Biofilm Formation of *Meyerozyma caribbica* to Improve Biocontrol Efficacy against Jujube Black Spot Rot. *J. Fungi* **2022**, *8*, 1313. <https://doi.org/10.3390/jof8121313>

Academic Editors: Nengguo Tao and Xiaoli Tan

Received: 23 November 2022

Accepted: 13 December 2022

Published: 17 December 2022

**Publisher's Note:** MDPI stays neutral with regard to jurisdictional claims in published maps and institutional affiliations.

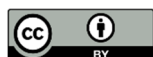

**Copyright:** © 2022 by the authors. Licensee MDPI, Basel, Switzerland. This article is an open access article distributed under the terms and conditions of the Creative Commons Attribution (CC BY) license (<https://creativecommons.org/licenses/by/4.0/>).

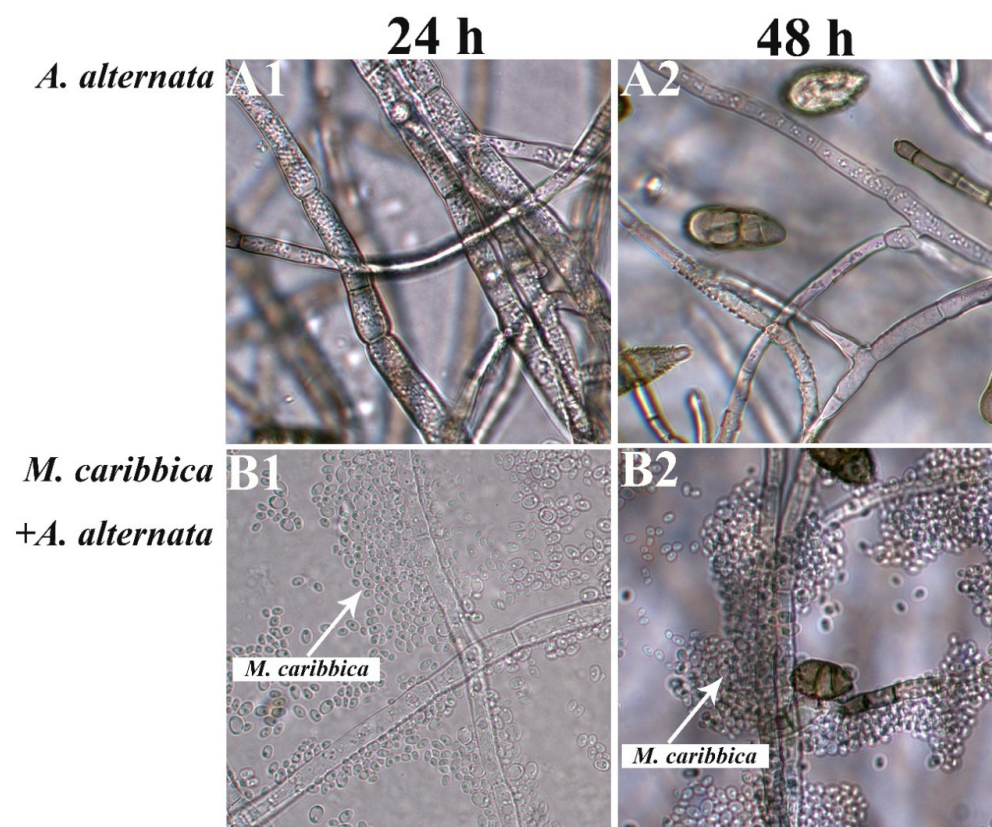

**Figure S1.** Interaction between *M. caribbica* and *A. alternata* for (A1,B1) 24 h/(A2,B2) 48 h after incubation. The *A. alternata* hyphae alone were used as a control. A-B: magnification of 1000×.

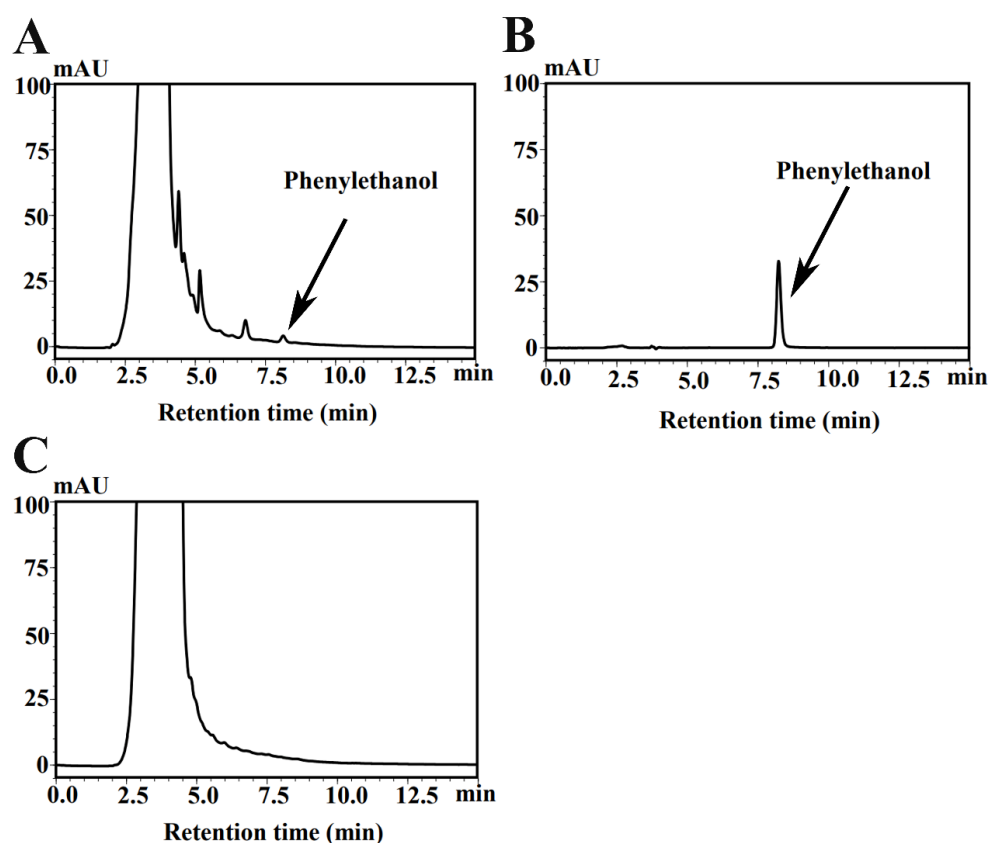

**Figure S2.** HPLC analysis of phenylethanol in CM (A–C). (A) CM medium, (B) Standard: commercial phenylethanol, and (C) NYDB medium.

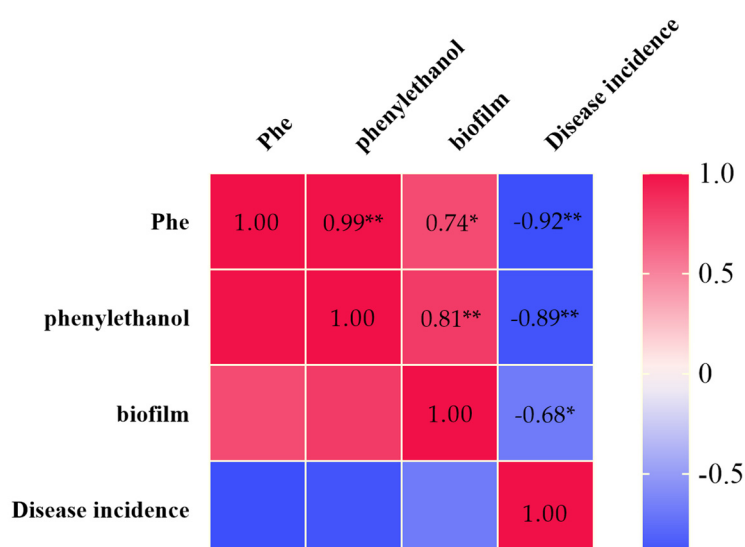

**Figure S3.** Pearson's correlation analysis among Phe, phenylethanol content, biofilm, and disease incidence. Each square color scale represents the correlation coefficient. \* indicates significant correlation ( $p < 0.05$ ), \*\* indicates highly significant correlation ( $p < 0.01$ ).
